# Supplementary material
Source: PubMed Central journal article supplement (PMC8059945)
Supplement: mmc1.pdf [file mmc1.pdf]

## **Supplemental information:**

### **Leveraging the Electronic Health Record to Address the COVID-19 Pandemic**

Benjamin A. Satterfield, MD, PhD<sup>1</sup>, Ozan Dikilitas, MD<sup>1</sup>, and Iftikhar J. Kullo, MD<sup>1</sup>

#### **Affiliations:**

<sup>1</sup>Department of Cardiovascular Medicine, Mayo Clinic, Rochester, MN 55905 USA

**Supplemental Table 1. Genetic variants associated at a genome-wide level with COVID-19 susceptibility and severity**

| rsID                     | Chr:Pos<br>(GRCh37) | Reference | Alternate | Genes                                                                                                                     | Phenotype(s)                                                    | Citation |
|--------------------------|---------------------|-----------|-----------|---------------------------------------------------------------------------------------------------------------------------|-----------------------------------------------------------------|----------|
| rs67579710               | 1:155173527         | G         | A         | <i>KRTCAP2, TIMR46, MUC1, THBS3, MTX1</i>                                                                                 | Hospitalization                                                 | 1        |
| rs1381109                | 2:166918293         | G         | T         | <i>SCN1A</i>                                                                                                              | Hospitalization                                                 | 1        |
| rs10490770               | 3:45864732          | T         | C         | <i>LZTFL1</i>                                                                                                             | Critical illness and hospitalization                            | 1        |
| rs11385942               | 3:45876460          | GA        | G         | <i>CCR9, CXCR6, FYCO1, LZTFL1, SLC6A20, XCR1</i>                                                                          | Severe illness with respiratory failure                         | 2        |
| rs73064425               | 3:45901089          | C         | T         | <i>LZTFL1</i>                                                                                                             | Critical illness                                                | 3        |
| rs11919389               | 3:101424458         | T         | C         | <i>ZBTB11, RPL24, CEP97, NXPE3</i>                                                                                        | Infection susceptibility                                        | 1        |
| rs10070196               | 5:13939830          | A         | C         | <i>DNAH5</i>                                                                                                              | Infection susceptibility                                        | 1        |
| rs9380142                | 6:29798794          | A         | G         | <i>HLA-G</i>                                                                                                              | Critical illness                                                | 3        |
| rs143334143              | 6:31121426          | G         | A         | <i>CCHCR1</i>                                                                                                             | Critical illness                                                | 3        |
| rs3131294                | 6:32180146          | G         | A         | <i>NOTCH4</i>                                                                                                             | Critical illness                                                | 3        |
| rs1886814                | 6:41502683          | A         | C         | <i>FOXP4</i>                                                                                                              | Hospitalization and infection susceptibility                    | 1        |
| rs72711165               | 8:125336564         | T         | C         | <i>TMEM65</i>                                                                                                             | Hospitalization                                                 | 1        |
| rs912805253/<br>rs529565 | 9:136149500         | C         | T         | <i>ABO</i>                                                                                                                | Hospitalization and infection susceptibility                    | 1        |
| rs657152                 | 9:136139265         | A         | C         | <i>ABO</i>                                                                                                                | Severe illness with respiratory failure                         | 2        |
| rs10774671               | 12:113357193        | G         | A         | <i>OAS1, OAS2, OAS3</i>                                                                                                   | Critical illness, hospitalization, and infection susceptibility | 1        |
| rs4767027                | 12:113359157        | T         | A         | <i>OAS1</i>                                                                                                               | Hepatization and infection susceptibility                       | 4        |
| rs10735079               | 12:113380008        | A         | G         | <i>OAS1, OAS2, OAS3</i>                                                                                                   | Critical illness                                                | 3        |
| rs1819040                | 17:44219831         | T         | A         | <i>ARHGAP27, PLEKHM1, LINC02210-CRHR1, CRHR1, SPPL2C, MAPT, STH, KANSL1, LRRC37A, ARL17B, LRRC37A1, ARL17A, NSF, WNT3</i> | Hospitalization                                                 | 1        |
| rs77534576               | 17:47940666         | C         | T         | <i>KAT7, TAC4</i>                                                                                                         | Critical illness                                                | 1        |
| rs2109069                | 19:4719443          | G         | A         | <i>DPP9</i>                                                                                                               | Critical illness, hospitalization, and infection susceptibility | 1, 3     |
| rs74956615               | 19:10427721         | T         | A         | <i>ICAM1, ICAM4, ICAM5, ZGLP1, FDX2, RAVER1, ICAM3, TYK2</i>                                                              | Critical illness and hospitalization                            | 1, 3     |
| rs4801778                | 19:49370609         | G         | T         | <i>PLEKHA4, PPP1R15A, TULP2, NUCB1</i>                                                                                    | Infection susceptibility                                        | 1        |
| rs13050728               | 21:34615210         | T         | C         | <i>IFNAR2</i>                                                                                                             | Critical illness and hospitalization                            | 1        |
| rs2236757                | 21:34624917         | G         | A         | <i>IFNAR2</i>                                                                                                             | Critical illness                                                | 3        |
| rs2834167                | 21:34640788         | G         | A         | <i>IL10RB</i>                                                                                                             | Severe illness and hepatization                                 | 4        |

<sup>a</sup>ACE2, Angiotensin-converting enzyme-2; Chr, Chromosome; GRCh, Genome Research Consortium human build; IFN, Interferon; Pos, position; TLR, Toll-like receptor

## Supplemental References

1. Ganna A. Mapping the human genetic architecture of COVID-19 by worldwide meta-analysis. *medRxiv*. 2021:2021.2003.2010.21252820.
2. Ellinghaus D, Degenhardt F, Bujanda L, et al. Genomewide association study of severe Covid-19 with respiratory failure. *New England Journal of Medicine*. 2020.
3. Pairo-Castineira E, Clohisey S, Klaric L, et al. Genetic mechanisms of critical illness in COVID-19. *Nature*. 2021;591(7848):92-98.
4. Zhou S, Butler-Laporte G, Nakanishi T, et al. A Neanderthal OAS1 isoform protects individuals of European ancestry against COVID-19 susceptibility and severity. *Nat Med*. 2021:1-9.
